# Supplementary material for: A broadly neutralizing antibody recognizing a unique epitope with signature motif common across coronaviral families
Source: Research Square preprint supplement (doi:10.21203/rs.3.rs-5856104/v1), 2025-02-11
Supplement: Supplementary file 1 [file 9a54f0f08de7c98c81ad8cda.pdf]

Extended Figures and Legends

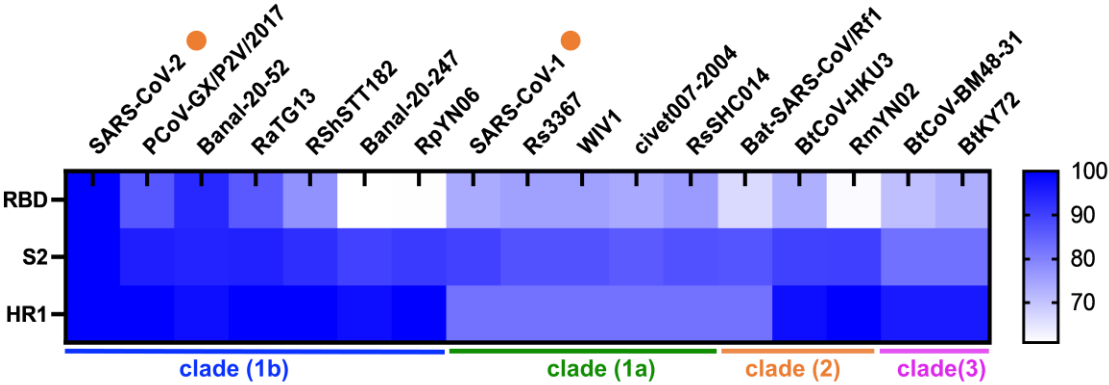

**Extended Fig. 1** Heat map depicting sequence homology and identity of the RBD domains, S2 subunits, and HR1 domains between SARS-CoV-2 and related sarbecoviruses from clades (1a), (1b), (2), and (3).

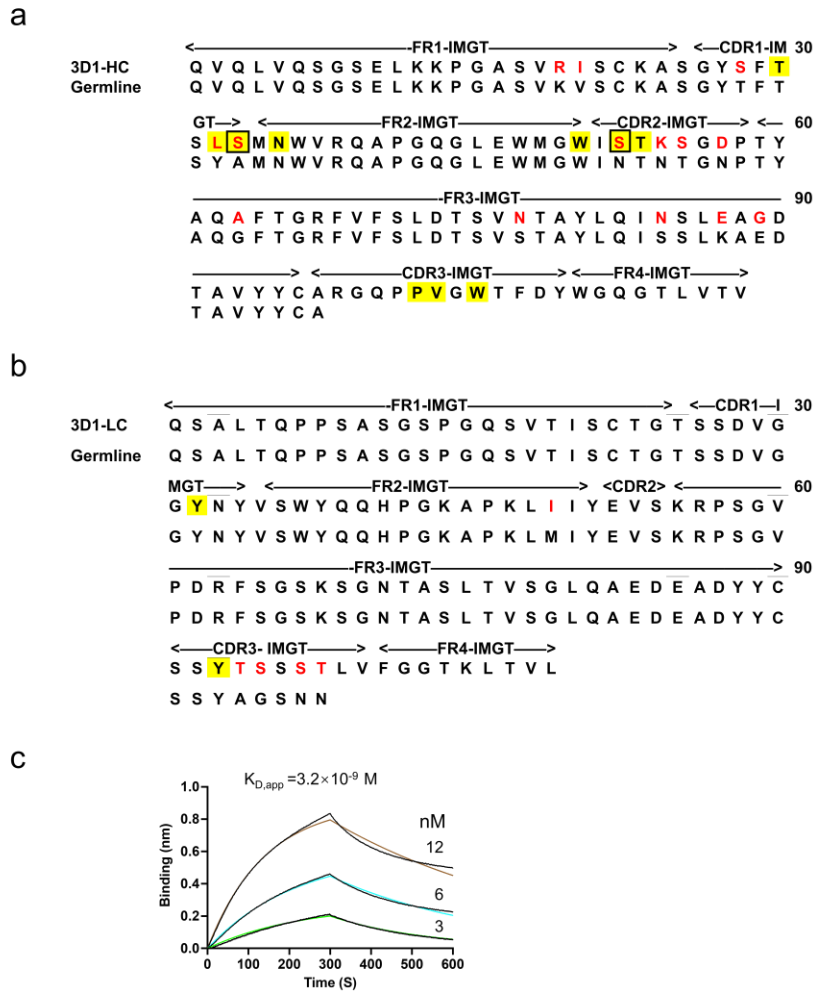

**Extended Fig. 2** Germline analysis of 3D1. The putative germline sequence and SHM germline sequences are aligned to the heavy (3D1-HC) (a) and light 3D1-LC (b) chain sequences. Residues from SHM are colored in red, and paratopes are highlighted with a yellow background. Residues in SHMs that are involved in interactions between side chains and their epitope are boxed. c, BLI results of 3D1-Germline against SARS-CoV-2 HR1C.

a

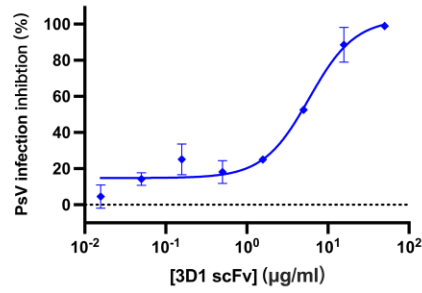

b

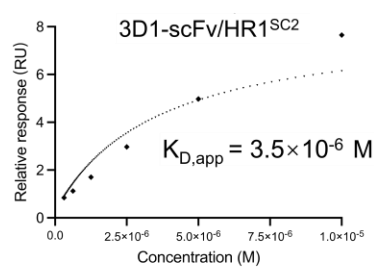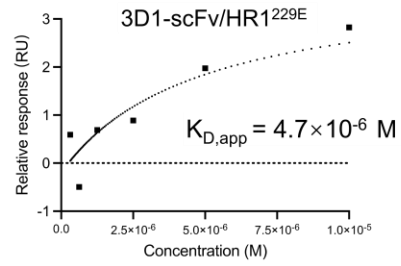

c

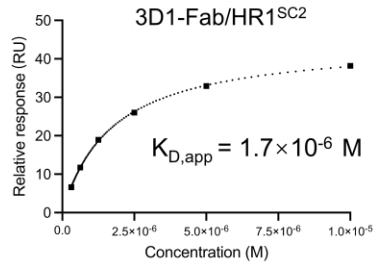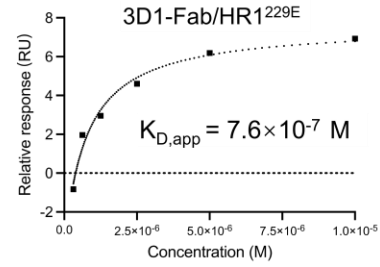

**Extended Fig. 3 a**, Dose-dependent inhibition of PsV of SARS-CoV-2 Dleta VOC by 3D1-scFv. **b-c**, SPR-based affinity measurement of 3D1-scFv (**b**) or 3D1-Fab (**c**) to HR1<sup>SC2</sup> (left panel) and HR1<sup>229E</sup> (right panel).

19

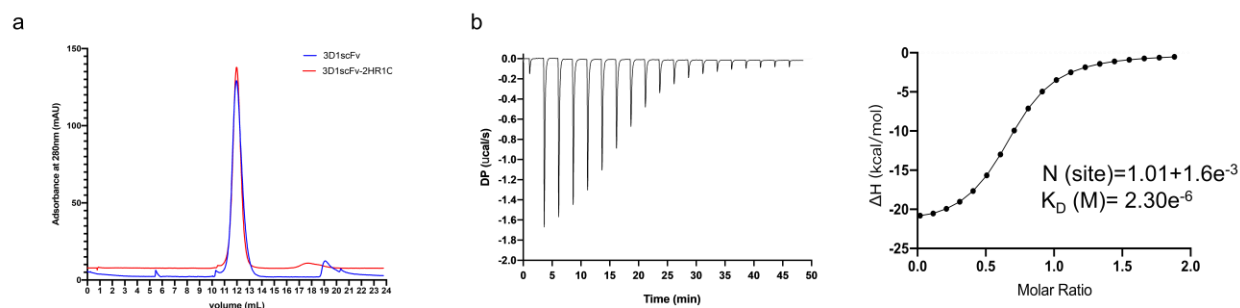

**Extended Fig. 4** Biophysical and stoichiometric analyses of 3D1 binding to HR1. **a**, SEC profile of 3D1-scFv incubated with HR1<sup>SC2</sup> on a Superdex<sup>TM</sup> 75pg column. **b**, ITC results of the titration of HR1<sup>SC2</sup> into 3D1-scFv.

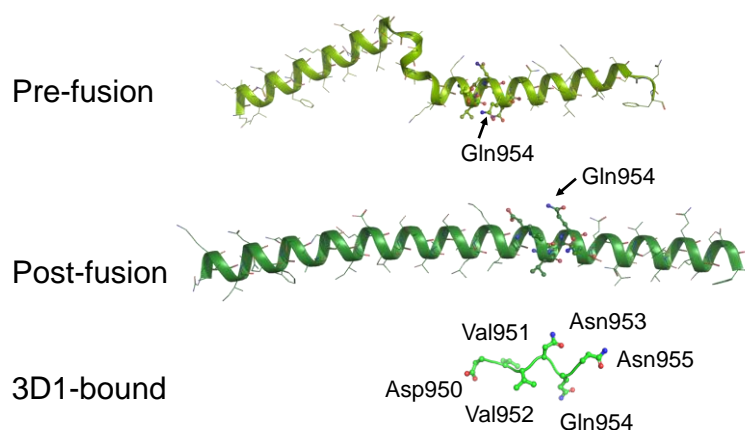

**Extended Fig. 5** Comparison of the HR1 conformation of 3D1-bound with those of HR1 in different fusion states. The signature-fold of <sup>950</sup>DVVNQN<sup>955</sup> is displayed as sticks, while other residues in the helical structures of HR1 in the prefusion and post-fusion states are shown as lines.

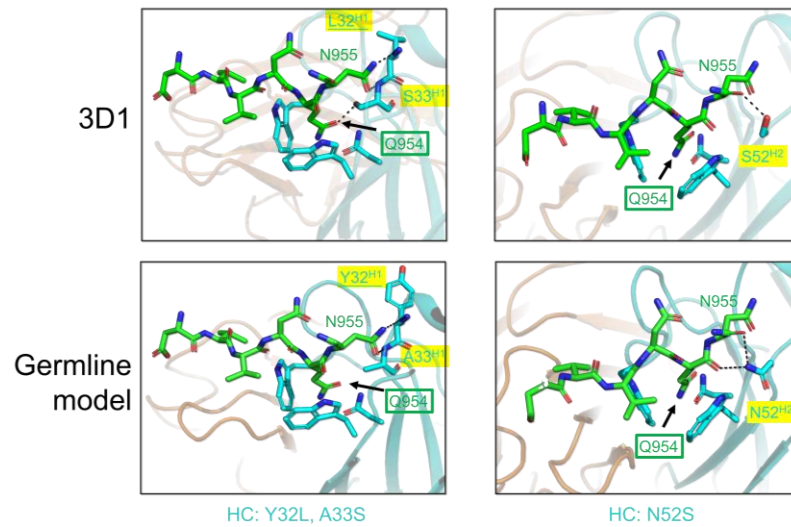

**Extended Fig. 6** Back-to-back comparison between Germline-HR1C<sup>SC2</sup> (model) and 3D1-HR1C<sup>SC2</sup>. SHM residues are shaded in yellow, and residues that participate in main-chain-to-side-chain interactions are underlined.

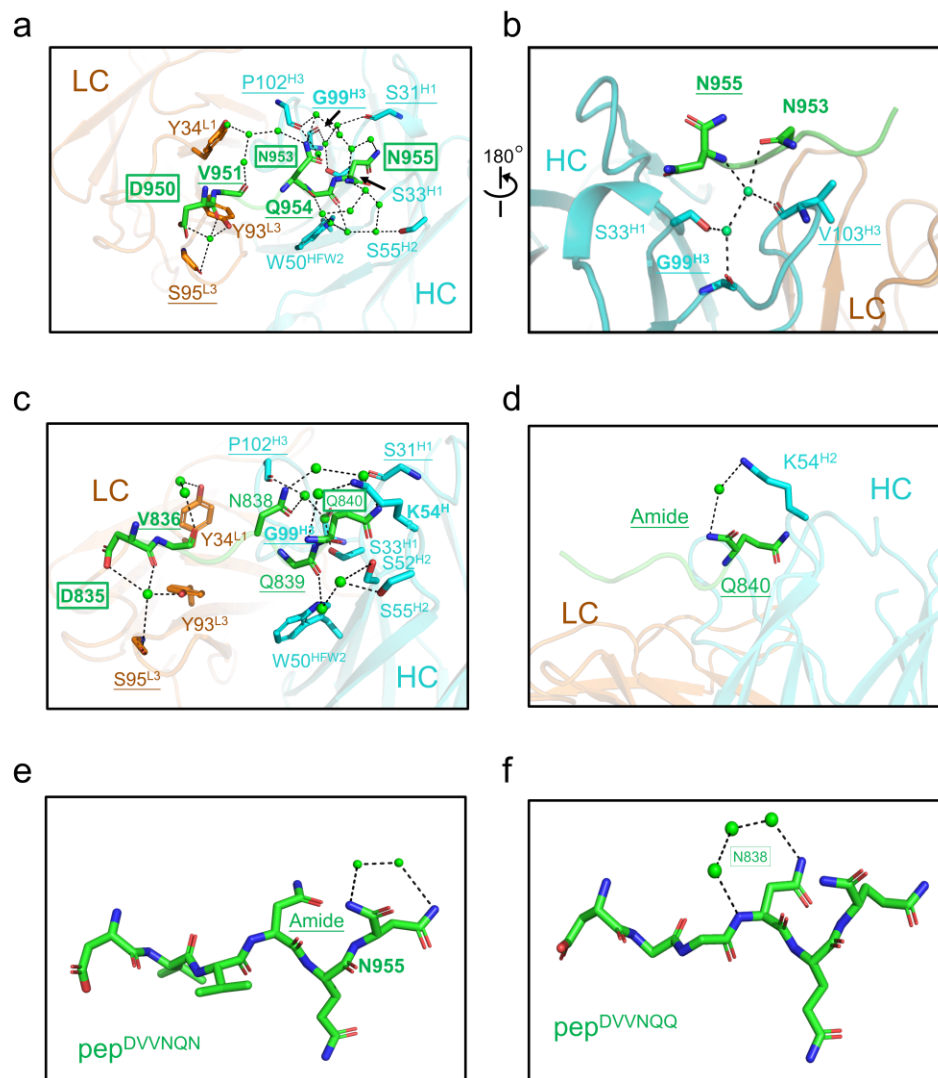

**Extended Fig. 7** Extensive hydrogen networks mediated by water molecules between 3D1 and HR1C<sup>SC2</sup> (a-d) and intrapeptide hydrogen bonds mediated by water (e-f), respectively. Water molecules are displayed as green spheres.

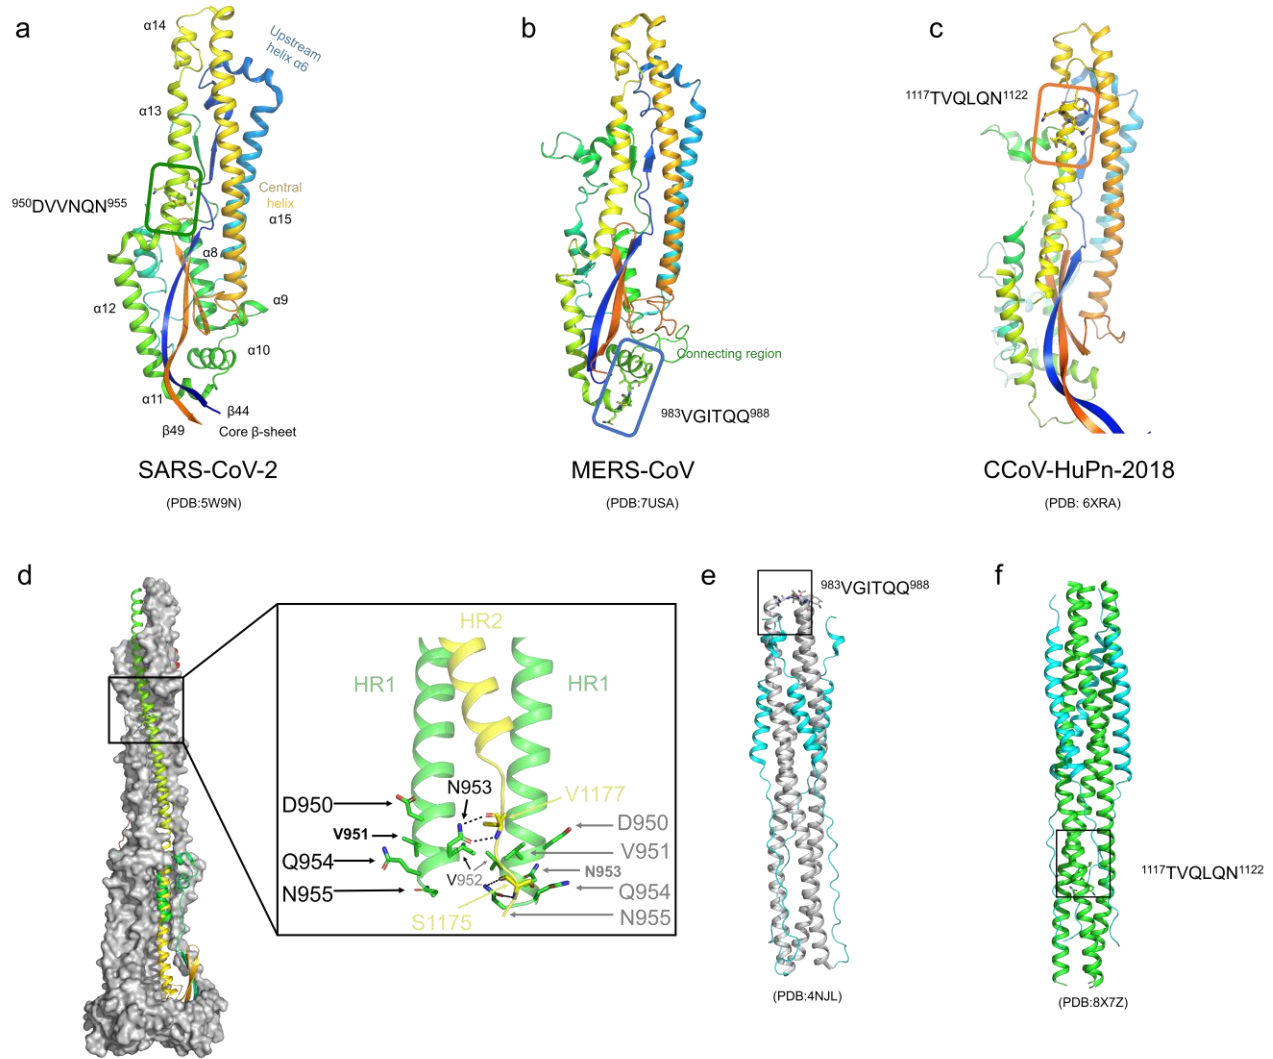

**Extended Fig. 8** Ribbon diagrams showing the structure of monomeric S2 of SARS-CoV-2 (starting at residue 755, PDB: 6VXX) (**a**), MERS-CoV (PDB: 5W9N) (**b**), and CCoV-HuPn-2018 (PDB: 7USA) (**c**) in the prefusion state. The epitopes of 3D1 on each S2 protomer are boxed. **d**, Trimeric S2 in the post-fusion state, along with a close-up view of the residues of the ‘DVVNQN’ motif, which is critical for the registration of HR2 into the groove formed by two neighboring HR1. (**e-f**) The post-fusion states of the spikes of MERS-CoV (**e**) and CCoV-HuPn-2018 (**f**), with their epitopes also indicated.

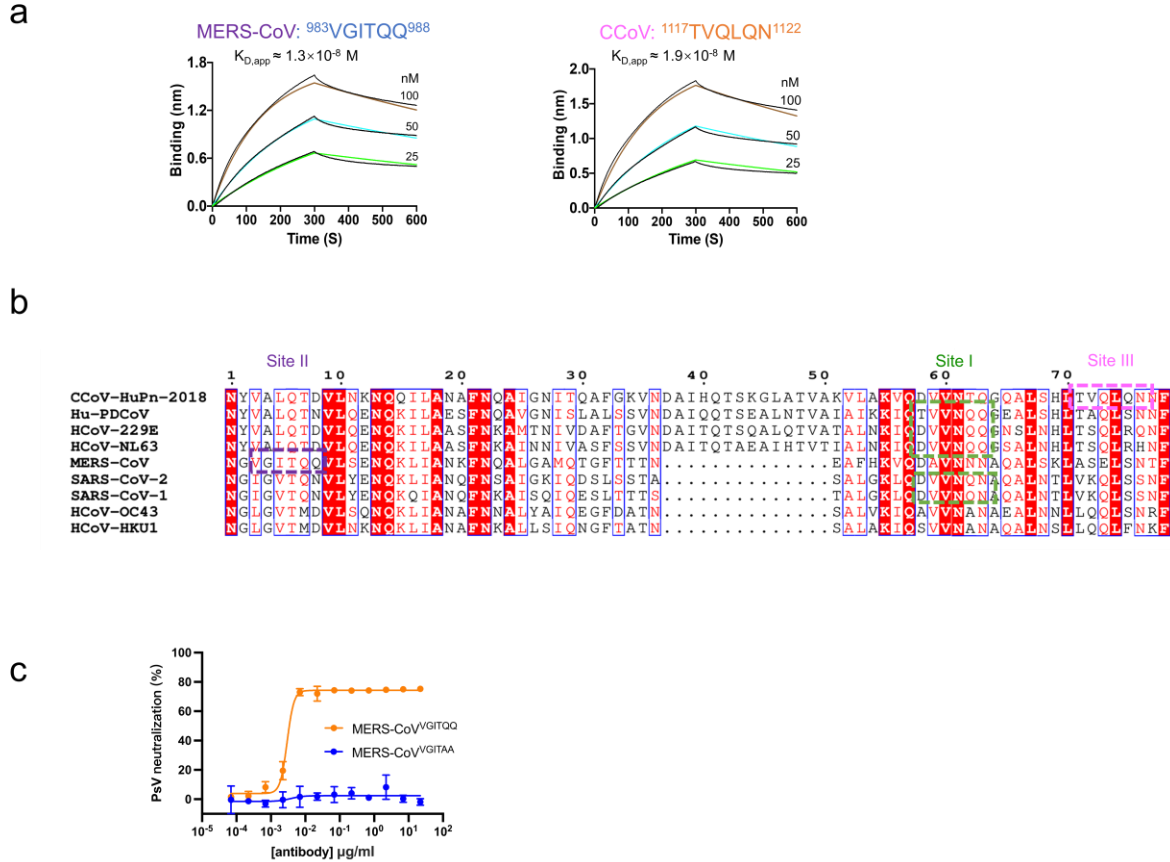

**Extended Fig. 9** Discovery and validation of alternative epitopes of 3D1. **a**, BLI results of 3D1 against peptides from MERS-CoV<sup>VGITQQ</sup> (left panel) and CCoV-HuPn-2018<sup>TVQLQN</sup> (right panel). **b**, Sequence alignments of extended HR1 domains from HCoVs. Epitopes of 3D1 at different sites are indicated. **c**, Mutations occurring in Site II of MERS-CoV spike that escape neutralization of 3D1.



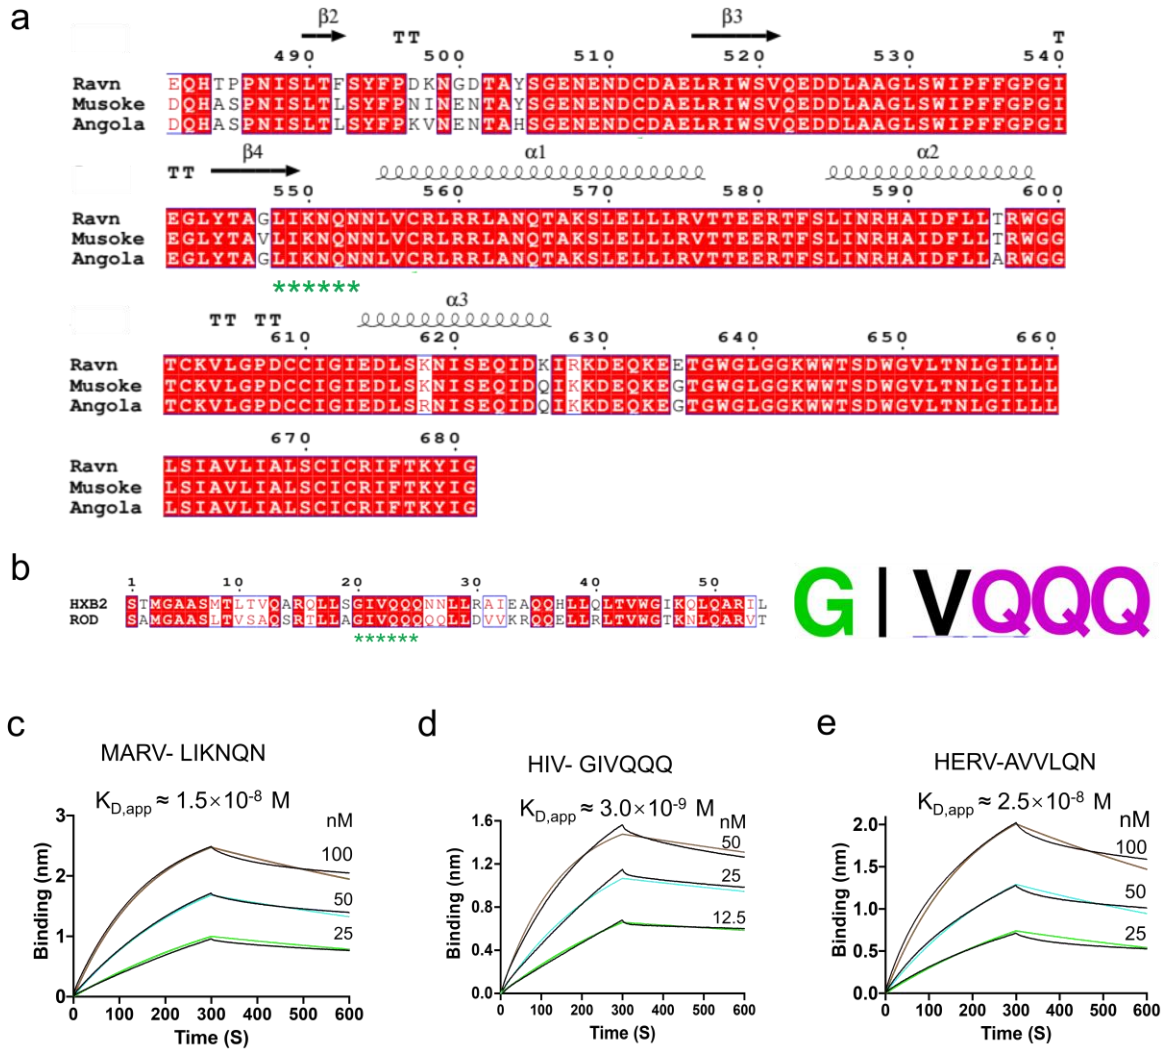

**Extended Fig. 10** **a**, Sequence alignment of GP2 from Marburgvirus RAVV (Ravn virus) and MARV (Musoke and Angola strains). The “LIKNNQ” motif is indicated with green asterisks. **b**, Sequence alignment of NHR domains from HIV-1 (HXB2 strain) and HIV-2 (ROD strain). A WebLogo plot displaying NHR sequences of HIV-1 spanning the “GIVQQQ” region shared by 7,936 out of 8,070 strains deposited in the HIV sequence database up to 2019 is shown alongside (<https://www.hiv.lanl.gov/content/sequence/NEWALIGN/align.html>). BLI binding profiles of 3D1 towards peptides from MARV (**c**), HIV (**d**), and HERV (**e**).

## Supplementary Tables

**Table S1.** Hydrogen bonds identified at the antibody-peptide interface calculated by the PISA program (*I*).

| Chain   | Residue | Ato | Distance (Å) | Chain | Residue | Atom |
|---------|---------|-----|--------------|-------|---------|------|
| Peptide |         |     |              | 3D1   |         |      |
| A       | Asp 950 | OD2 | 2.70         | L     | Tyr 32  | OH   |
| A       | Asp 950 | O   | 3.75         | L     | Tyr 93  | OH   |
| A       | Val 952 | N   | 3.02         | L     | Tyr 93  | OH   |
| A       | Val 952 | O   | 2.83         | H     | Trp 105 | NE1  |
| A       | Asn 953 | ND2 | 3.08         | H     | Pro 102 | O    |
| A       | Gln 954 | OE1 | 2.64         | H     | Ser 33  | OG   |
| A       | Gln 954 | OE1 | 2.93*        | H     | Asn 35  | ND2  |
| A       | Gln 954 | NE2 | 3.00*        | H     | Asn 35  | OD1  |
| A       | Gln 954 | O   | 2.88*        | H     | Trp 50  | NE1  |
| A       | Gln 954 | N   | 2.93*        | H     | Val 103 | O    |
| A       | Asn 955 | ND2 | 3.03         | H     | Thr 30  | O    |
| A       | Asn 955 | OD1 | 3.52*        | H     | Ser 52  | OG   |
| A       | Asn 955 | O   | 2.73         | H     | Ser 52  | OG   |
| A       | Asn 955 | OD1 | 2.84         | H     | Thr 53  | N    |
| A       | Asn 955 | OD1 | 3.27*        | H     | Thr 53  | OG1  |
| A       | Asn 955 | ND2 | 3.16 *       | H     | Thr 53  | OG1  |

Note: Hydrogen bonds are defined as interactions exhibiting the necessary geometry with contact distances of 3.8 Å or less.

**Table S2.** Hydrogen bonds identified at antibody-peptide interface calculated by the PISA program (*I*).

| Chain   | Residue | Ato | Distance (Å) | Chain | Residue | Atom |
|---------|---------|-----|--------------|-------|---------|------|
| Peptide |         |     |              | 3D1   |         |      |
| A       | Asp 835 | O   | 3.69         | L     | Tyr 93  | OH   |
| A       | Val 837 | N   | 3.11         | L     | Tyr 93  | OH   |
| A       | Val 837 | O   | 2.92         | H     | Trp 105 | NE1  |
| A       | Gln 839 | OE1 | 2.81         | H     | Ser 33  | OG   |
| A       | Gln 839 | NE2 | 2.90*        | H     | Asn 35  | OD1  |
| A       | Gln 839 | OE1 | 2.75*        | H     | Asn 35  | ND2  |
| A       | Gln 839 | O   | 2.80*        | H     | Trp 50  | NE1  |
| A       | Gln 839 | N   | 2.87*        | H     | Val 103 | O    |
| A       | Gln 840 | NE2 | 3.07         | H     | Thr 30  | O    |
| A       | Gln 840 | O   | 2.87*        | H     | Ser 52  | OG   |
| A       | Gln 840 | OE1 | 3.60         | H     | Ser 52  | OG   |
| A       | Gln 840 | OE1 | 2.96         | H     | Thr 53  | N    |
| A       | Gln 840 | OE1 | 3.25*        | H     | Thr 53  | OG1  |
| A       | Gln 840 | NE2 | 3.14*        | H     | Thr 53  | OG1  |

Note: Hydrogen bonds are defined as interactions exhibiting the necessary geometry with contact distances of 3.8 Å or less.
